# Supplementary material for: Spp382p Interacts with Multiple Yeast Splicing Factors, Including Possible Regulators of Prp43 DExD/H-Box Protein Function
Source: Oxford University Press journal article supplement (doi:10.1534/genetics.109.106955), 2009-07-07
Supplement: figures2.pdf [file figures2.pdf]

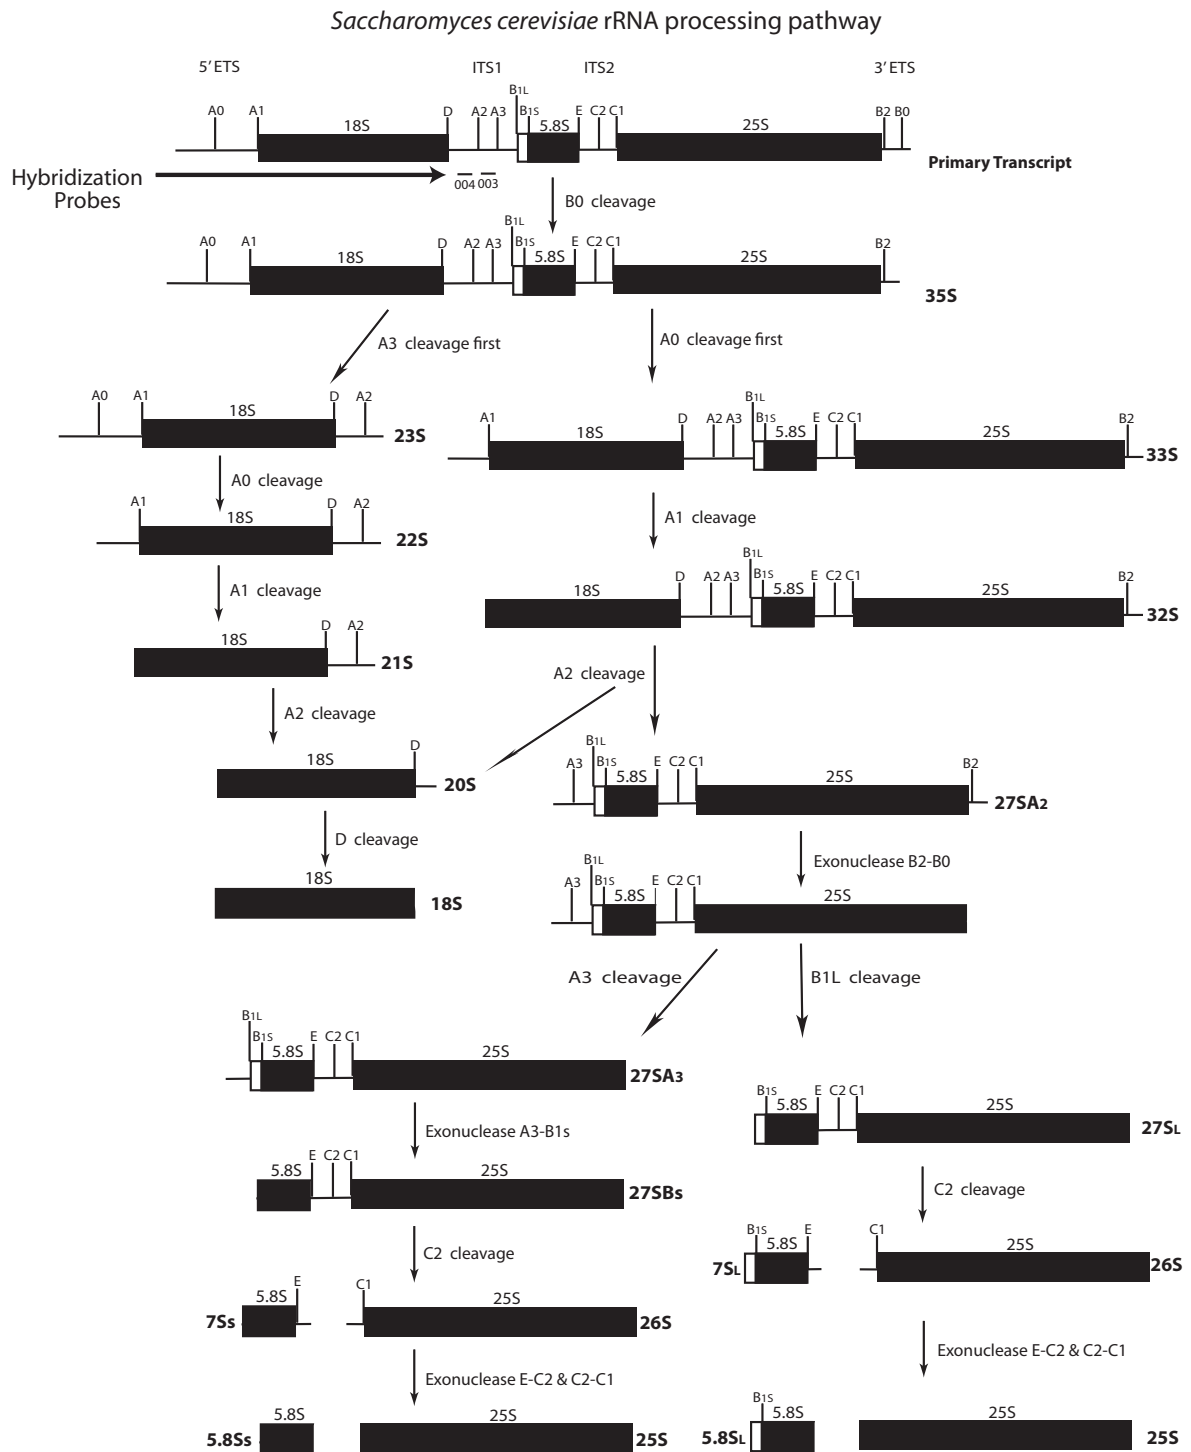

Adapted from: M. Kos, and D. Tollervey, 2005. Mol Cell 20:53-64;

S. Granneman et. al, 2006. Mol Cell Biol 26:1183-94.

FIGURE S2.—A schematic of the yeast rRNA biogenesis. This image show the parallel processing of the 35S precursor ribosomal RNA into the mature 25S, 18S and 5.8S rRNA products through two alternative paths based on initial cleavage at the A3 (left) or A0 (right) site is shown (see (GRANNEMAN *et al.* 2006; KOS and TOLLERVEY 2005) for related discussion). The placement of the hybridization probes used for the detection of the 35 S precursor and the 23S and 20S (probe 004) and 27SA2 (probe 003) intermediates is indicated on the first line.
